# Supplementary material
Source: PubMed Central journal article supplement (PMC3798847)
Supplement: ejhg201342x1.pdf [file ejhg201342x1.pdf]

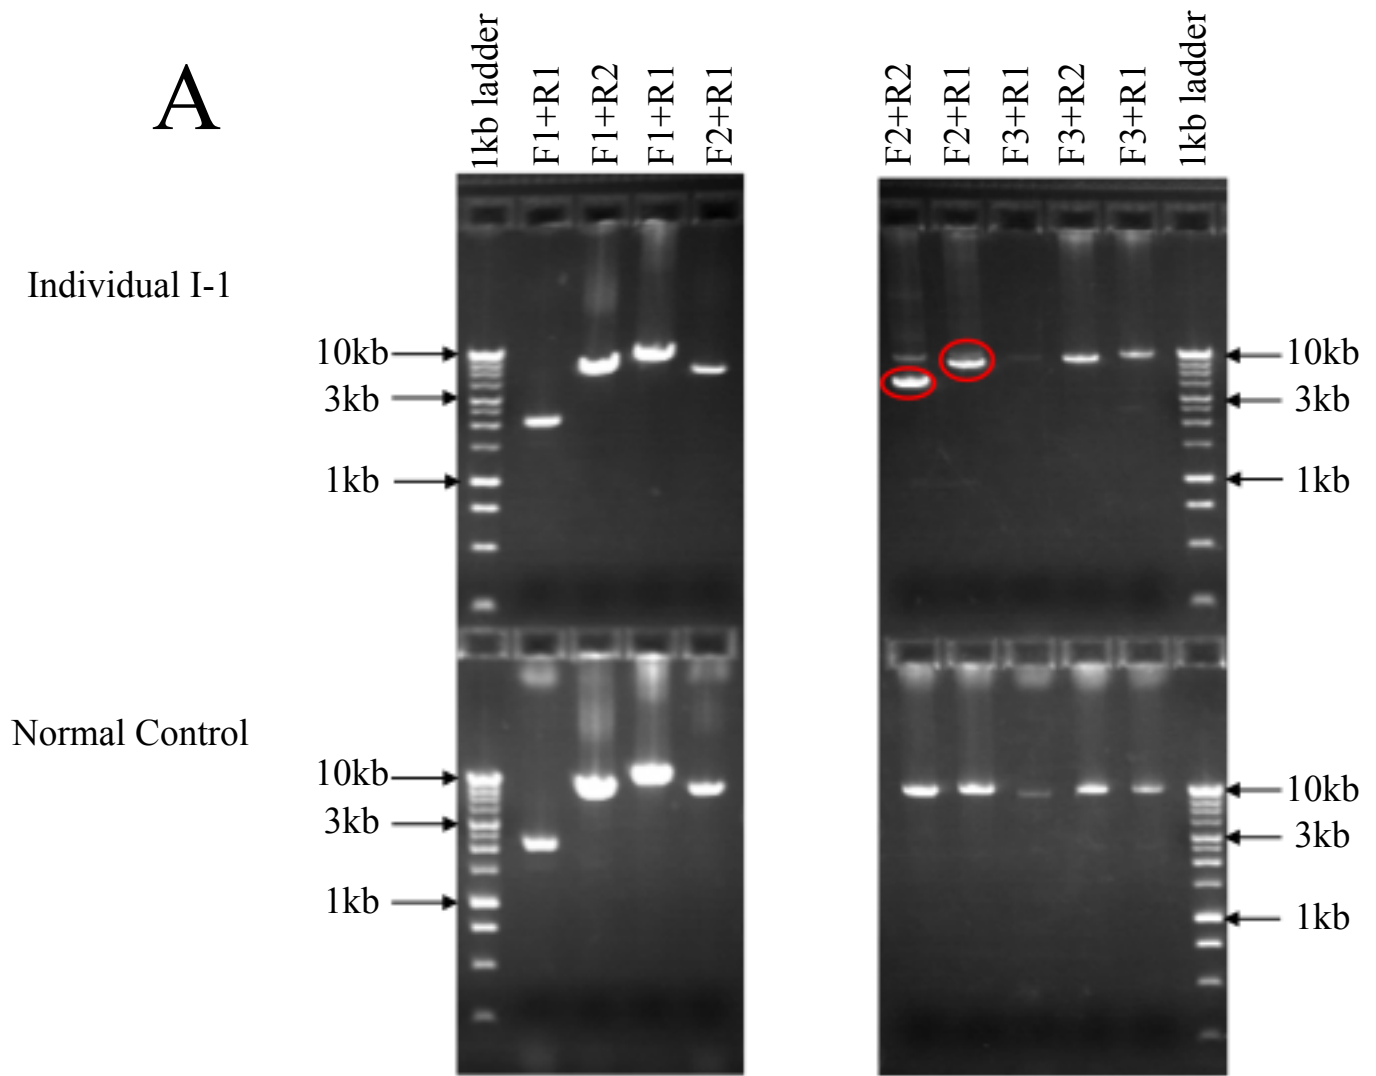

**B**

F1  
GACTTAAGAATGACCCTCAGACATGGTGAC  
F2  
CCCCAGTTAGTGTCTGATGATGATGGTAAG  
F3  
ATTGTTACCTAGACTTGGGGACAGAGAAGG  
F4  
CTGTGCTATCAGGAGACAGAACAACAAGACC  
R1  
CCTAAAAGTTCTTTACTCTGCTCCAGGAAAGG  
R2  
GCGATGTGTGTGTAATAGGATGGTAAGCTG  
R3  
GTGTATTGTGAACAGCAACAAGGGATATCAAC

**Figure S1** IGF1R deletion PCR confirmation.

(A) PCR confirms presence of a deletion within *IGF1R* in individual I-1, as shown by presence of an additional, smaller PCR-product with primer combinations F2/R2 and F2/R1, not present in control. (B) Primer sequences
